# Supplementary material for: Malaria species prevalence among asymptomatic individuals in four regions of Mainland Tanzania
Source: PubMed Central journal article supplement — medRxiv. 2023 Dec 30:2023.12.28.23300584. Preprint. [Version 1] doi: 10.1101/2023.12.28.23300584 (PMC10793544; doi:10.1101/2023.12.28.23300584), 2023-12-30
Supplement: NIHPP2023.12.28.23300584v1-supplement-1.pdf [file NIHPP2023.12.28.23300584v1-supplement-1.pdf]

307 *Supplemental Table 1 – Regional Distribution of Samples in Random Subset and Full Dataset*

| <b>Region</b>        | <b>Subset</b> | <b>Full Dataset</b> |
|----------------------|---------------|---------------------|
| Kigoma               | 252 (36.3%)   | 878 (33.2%)         |
| Ruvuma               | 186 (26.8%)   | 741 (28.0%)         |
| Tanga                | 256 (36.9%)   | 1,028 (38.8%)       |
| <b>Total Samples</b> | <b>694</b>    | <b>2,647</b>        |

308

309 *Supplemental Table 2 – Age Group Distribution of Samples in Random Subset and Full Dataset*

| <b>Age Group</b>            | <b>Subset</b> | <b>Full Dataset</b> |
|-----------------------------|---------------|---------------------|
| Young Children (<5 years)   | 92 (13.3%)    | 450 (17.0%)         |
| Schoolchildren (5-16 years) | 234 (33.7%)   | 962 (36.3%)         |
| Adults (>16 years)          | 368 (53.0%)   | 1,235 (46.7%)       |
| <b>Total Samples</b>        | <b>694</b>    | <b>2,647</b>        |

310

311 *Supplemental Table 3 – Sex Distribution of Samples in Random Subset and Full Dataset*

| <b>Sex</b>           | <b>Subset</b> | <b>Full Dataset</b> |
|----------------------|---------------|---------------------|
| Female               | 505 (72.8%)   | 1,568 (59.3%)       |
| Male                 | 189 (27.2%)   | 1,078 (40.7%)       |
| <b>Total Samples</b> | <b>694</b>    | <b>2,646*</b>       |

312 \*Sex was not reported for all individuals.

313

314

Supplemental Table 4 – Species Positivity by Region and Age Group

| Region | Age Group       | Pf-Positive Samples | Pm-Positive Samples | Po-Positive Samples | Total Samples |
|--------|-----------------|---------------------|---------------------|---------------------|---------------|
| Geita* | Young Children  | 278 (37.9%)         | 5 (0.7%)            | 27 (3.7%)           | 734           |
|        | Schoolchildren  | *                   | *                   | *                   | *             |
|        | Adults          | *                   | *                   | *                   | *             |
|        | <b>All Ages</b> | <b>278 (37.9%)</b>  | <b>5 (0.7%)</b>     | <b>27 (3.7%)</b>    | <b>734</b>    |
| Kigoma | Young Children  | 7 (18.4%)           | 1 (2.6%)            | 1 (2.6%)            | 38            |
|        | Schoolchildren  | 26 (34.2%)          | 2 (2.6%)            | 7 (9.2%)            | 76            |
|        | Adults          | 26 (18.8%)          | 2 (1.4%)            | 2 (1.4%)            | 138           |
|        | <b>All Ages</b> | <b>59 (23.4%)</b>   | <b>5 (2.0%)</b>     | <b>10 (4.0%)</b>    | <b>252</b>    |
| Ruvuma | Young Children  | 0                   | 0                   | 0                   | 23            |
|        | Schoolchildren  | 22 (37.9%)          | 2 (3.4%)            | 3 (5.1%)            | 58            |
|        | Adults          | 35 (33.3%)          | 2 (1.9%)            | 3 (2.9%)            | 105           |
|        | <b>All Ages</b> | <b>57 (30.6%)</b>   | <b>4 (2.2%)</b>     | <b>6 (3.2%)</b>     | <b>186</b>    |
| Tanga  | Young Children  | 8 (25.8%)           | 1 (3.2%)            | 0                   | 31            |
|        | Schoolchildren  | 44 (44%)            | 1 (1%)              | 1 (1%)              | 100           |
|        | Adults          | 42 (33.6%)          | 6 (4.8%)            | 5 (4%)              | 125           |
|        | <b>All Ages</b> | <b>94 (36.7%)</b>   | <b>8 (3.1%)</b>     | <b>6 (2.3%)</b>     | <b>256</b>    |

315 \*Only children under five were enrolled in the study in Geita. Schoolchildren are defined as ages

316 5-16, and adults are all those >16 years.

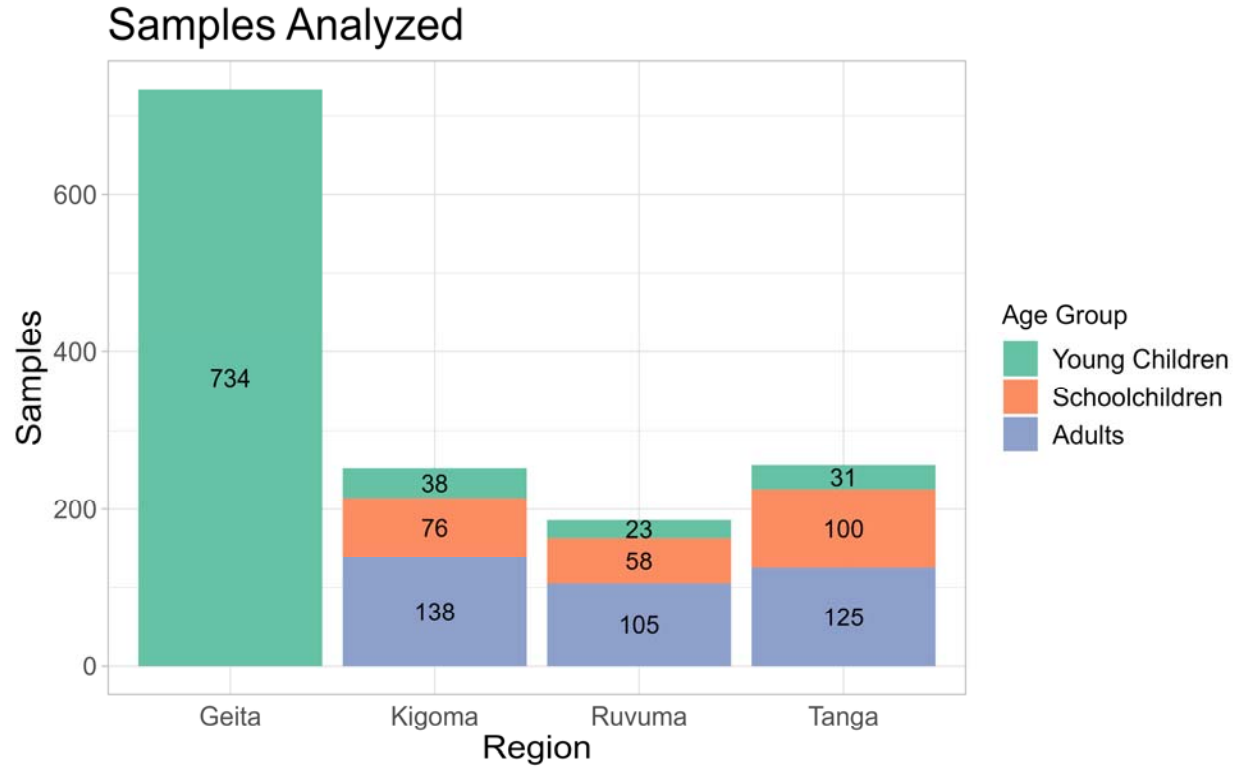

317

318

Figure S1 – Samples included in analysis by age group and region.
